# Supplementary material for: Nanofibrillar hydrogels outperform Pt/C for hydrogen evolution reactions under high-current conditions
Source: Royal Society of Chemistry journal article supplement (doi:10.1039/d2ta08775h), 2022-12-06
Supplement: d2ta08775h1.pdf [file d2ta08775h1.pdf]

## Electronic Supplementary Information

# Nanofibrillar hydrogels outperform Pt/C for hydrogen evolution reactions under high-current conditions

*Jinwoo Park,<sup>‡a</sup> Dasom Jeon,<sup>‡ab</sup> Yunseok Kang,<sup>ab</sup> Jungki Ryu<sup>\*abc</sup> and Dong Woog Lee<sup>\*a</sup>*

<sup>a</sup>Department of Energy Engineering, School of Energy and Chemical Engineering, Ulsan National Institute of Science and Technology (UNIST), Ulsan 44919, Republic of Korea.

<sup>b</sup>Emergent Hydrogen Technology R&D Center, Ulsan National Institute of Science and Technology (UNIST), Ulsan 44919, Republic of Korea.

<sup>c</sup>Graduate School of Carbon Neutrality, Ulsan National Institute of Science and Technology (UNIST), Ulsan 44919, Republic of Korea.

<sup>‡</sup>J. Park and D. Jeon contributed equally to this work.

\*Corresponding authors.

Email addresses: [jryu@unist.ac.kr](mailto:jryu@unist.ac.kr) (J. Ryu); [dongwoog.lee@unist.ac.kr](mailto:dongwoog.lee@unist.ac.kr) (D. W. Lee).

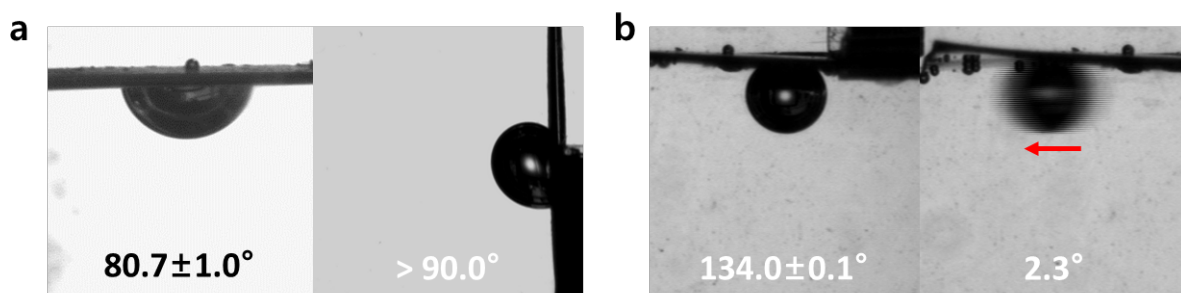

**Fig. S1.** Air contact and sliding angles of a) fNi and b) hydrogel-coated fNi (HG-fNi).

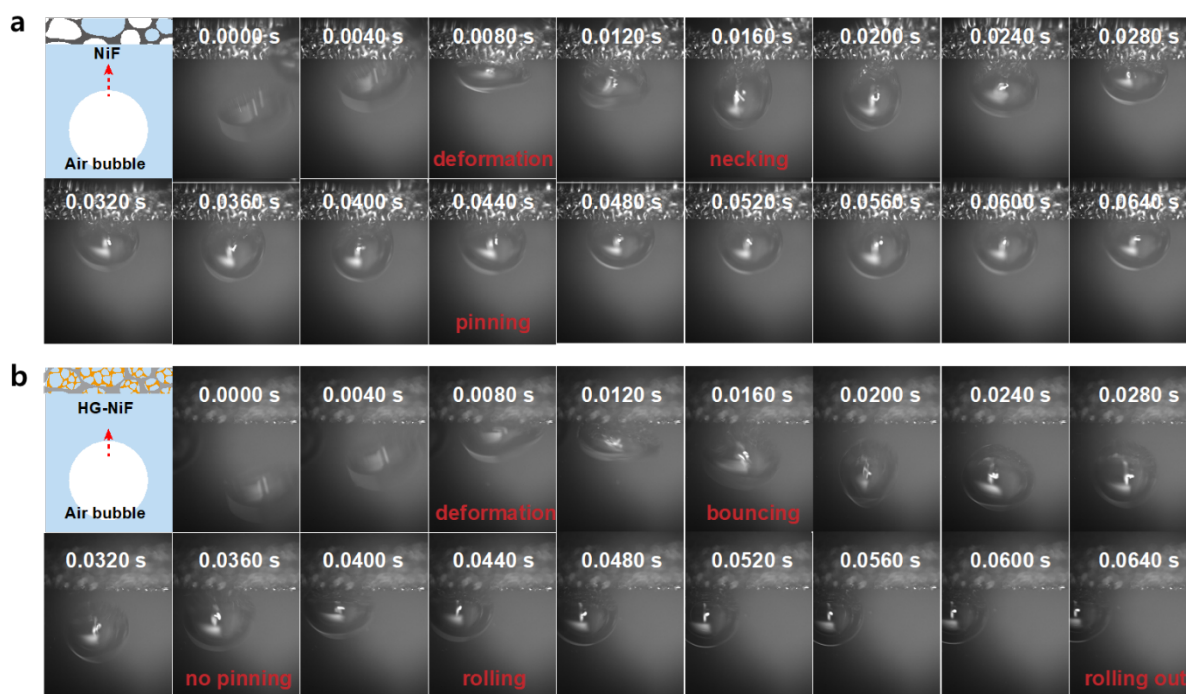

**Fig. S2.** High-speed camera images of air bubbles (volume = 25 μL) colliding with a) NiF and b) HG-NiF.

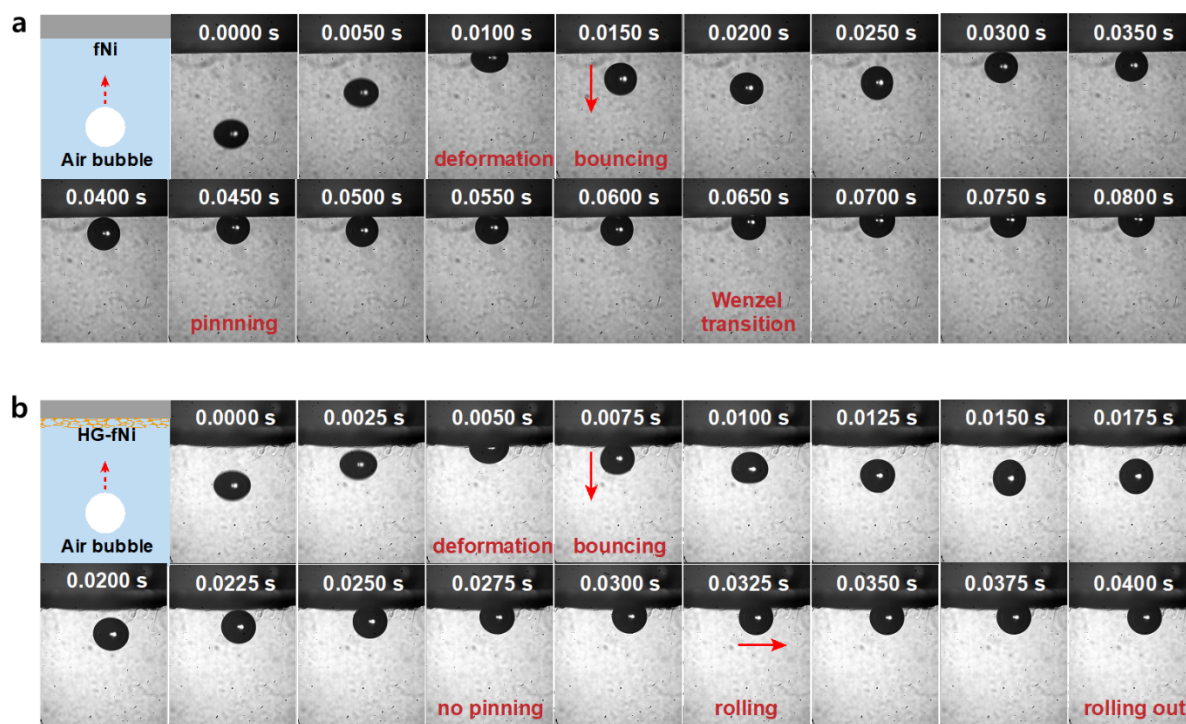

**Fig. S3.** High-speed camera images of air bubbles (volume = 1  $\mu\text{L}$ ) colliding with a) fNi and b) HG-fNi.

**Table S1.** Fitting results of electrochemical impedance spectra shown in Figure 4d.

|               | $R_1^a$ ( $\Omega$ ) | $R_2^b$ ( $\Omega$ )<br>CPE <sup>c</sup> (mF) |
|---------------|----------------------|-----------------------------------------------|
| <b>Ni</b>     | 4.46                 | 29.86                                         |
|               |                      | 46.98                                         |
| <b>HG-NiF</b> | 3.877                | 21.85                                         |
|               |                      | 30.78                                         |

<sup>a</sup> $R_1$  is a series resistance of electrical conduction through an external circuit and ionic conduction through an electrolyte.

<sup>b</sup> $R_2$  represents a resistance related to catalytic hydrogen evolution reaction.

<sup>c</sup>CPE represent a constant phase element.

**Table S2.** Overpotentials of various superaerophobic electrodes shown in Figure 4e for alkaline hydrogen evolution reaction.

| Catalyst                                  | Electrolyte | Overpotential (mV)               | Ref.      |
|-------------------------------------------|-------------|----------------------------------|-----------|
| HG-NiF                                    | 1.0 M KOH   | -750 @ -1000 mA cm <sup>-2</sup> | This work |
| Pt/C                                      | 1.0 M KOH   | -750 @ -693 mA cm <sup>-2</sup>  | This work |
| CoMoS <sub>x</sub>                        | 1.0 M KOH   | -280 @ -600 mA cm <sup>-2</sup>  | [1]       |
| P-Ni(OH) <sub>2</sub> /NiMoO <sub>4</sub> | 1.0 M KOH   | -500 @ -300 mA cm <sup>-2</sup>  | [2]       |
| NSF/CNT                                   | 1.0 M KOH   | -320 @ -300 mA cm <sup>-2</sup>  | [3]       |
| CoSF/CNT                                  | 1.0 M KOH   | -700 @ -350 mA cm <sup>-2</sup>  | [3]       |
| FeSF/CNT                                  | 1.0 M KOH   | -500 @ -300 mA cm <sup>-2</sup>  | [3]       |
| FeCoNi-HNTAs                              | 1.0 M KOH   | -280 @ -150 mA cm <sup>-2</sup>  | [4]       |
| MoS <sub>2</sub>                          | 1.0 M KOH   | -600 @ -150 mA cm <sup>-2</sup>  | [4]       |
| Cu <sub>3</sub> P                         | 1.0 M KOH   | -400 @ -120 mA cm <sup>-2</sup>  | [5]       |
| CoMnP/Ni <sub>2</sub> P                   | 1.0 M KOH   | -200 @ -50 mA cm <sup>-2</sup>   | [6]       |

**Table S3.** Comparison of HG-NiF to the efficiency and prices of various inorganic catalysts in 1.0 M KOH solution.

| Catalyst                 | Electrolyte | Overpotential (mV) | Current density (mA cm <sup>-2</sup> ) | Mass loading (mg cm <sup>-2</sup> ) | Price (\$ mg <sup>-1</sup> ) | Ref.      |
|--------------------------|-------------|--------------------|----------------------------------------|-------------------------------------|------------------------------|-----------|
| HG-NiF                   | 1.0 M KOH   | 750                | 1000                                   | 0.002                               | 22.5                         | This work |
| Pt/C                     | 1.0 M KOH   | 750                | 693                                    | 28                                  | 0.0070                       | This work |
| Ru@Co-SAs                | 1.0 M KOH   | 7                  | 10                                     | 0.285                               | 0.0032                       | [7]       |
| RuCo                     | 1.0 M KOH   | 28                 | 10                                     | 0.28                                | 0.0021                       | [8]       |
| Ni-MOF                   | 1.0 M KOH   | 40                 | 10                                     | 0.5                                 | 0.000018                     | [9]       |
| Ni(OH) <sub>2</sub> /CuS | 1.0 M KOH   | 95                 | 10                                     | 0.29                                | 0.000012                     | [10]      |
| CoSAs-CoNPs              | 1.0 M KOH   | 205                | 10                                     | 14                                  | 0.000053                     | [11]      |

## Supporting References

- [1] X. Shan, J. Liu, H. Mu, Y. Xiao, B. Mei, W. Liu, G. Lin, Z. Jiang, L. Wen, L. Jiang, An engineered superhydrophilic/superaerophobic electrocatalyst composed of the supported CoMoS<sub>x</sub> chalcogen for overall water splitting, *Angew. Chem. Int. Ed.* 59 (2020) 1659-1665.
- [2] W. Xi, G. Yan, H. Tan, L. Xiao, S. Cheng, S.U. Khan, Y. Wang, Y. Li, Superaerophobic P-doped Ni(OH)<sub>2</sub>/NiMoO<sub>4</sub> hierarchical nanosheet arrays grown on Ni foam for electrocatalytic overall water splitting, *Dalton Trans.* 47 (2018) 8787-8793.
- [3] M. Guo, A. Qayum, S. Dong, X. Jiao, D. Chen, T. Wang, In situ conversion of metal (Ni, Co or Fe) foams into metal sulfide (Ni<sub>3</sub>S<sub>2</sub>, Co<sub>9</sub>S<sub>8</sub> or FeS) foams with surface grown N-doped carbon nanotube arrays as efficient superaerophobic electrocatalysts for overall water splitting, *J. Mater. Chem. A* 8 (2020) 9239-9247.
- [4] H. Li, S. Chen, Y. Zhang, Q. Zhang, X. Jia, Q. Zhang, L. Gu, X. Sun, L. Song, X. Wang, Systematic design of superaerophobic nanotube-array electrode comprised of transition-metal sulfides for overall water splitting, *Nat. Commun.* 9 (2018) 2452.
- [5] J. Hao, W. Yang, Z. Huang, C. Zhang, Superhydrophilic and superaerophobic copper phosphide microsheets for efficient electrocatalytic hydrogen and oxygen evolution, *Adv. Mater. Interfaces*, 3 (2016) 1600236.
- [6] M. Liu, Z. Sun, S. Li, X. Nie, Y. Liu, E. Wang, Z. Zhao, Hierarchical superhydrophilic/superaerophobic CoMnP/Ni<sub>2</sub>P nanosheet-based microplate arrays for enhanced overall water splitting, *J. Mater. Chem. A* 9 (2021) 22129-22139.
- [7] S. Yuan, Z. Pu, H. Zhou, J. Yu, I.S. Amiinu, J. Zhu, Q. Liang, J. Yang, D. He, Z. Hu, G. Van Tendeloo, S. Mu, A universal synthesis strategy for single atom dispersed cobalt/metal clusters heterostructure boosting hydrogen evolution catalysis at all pH values, *Nano Energy* 59 (2019) 472-480.
- [8] J. Su, Y. Yang, G. Xia, J. Chen, P. Jiang, Q. Chen, Ruthenium-cobalt nanoalloys encapsulated in nitrogen-doped graphene as active electrocatalysts for producing hydrogen in alkaline media, *Nat. Commun.* 8 (2017) 14969.
- [9] L. Wang, L. Ren, X. Wang, X. Feng, J. Zhou, B. Wang, Multivariate MOF-templated pomegranate-like Ni/C as efficient bifunctional electrocatalyst for hydrogen evolution and urea

oxidation, ACS Appl. Mater. Interfaces 10 (2018) 4750-4756.

[10] S.-Q. Liu, H.-R. Wen, G. Ying, Y.-W. Zhu, X.-Z. Fu, R. Sun, C.-P. Wong, Amorphous Ni(OH)<sub>2</sub> encounter with crystalline CuS in hollow spheres: A mesoporous nano-shelled heterostructure for hydrogen evolution electrocatalysis, Nano Energy 44 (2018) 7-14.

[11] M. Wang, M. Li, Y. Zhao, N. Shi, H. Zhang, Y. Zhao, Y. Zhang, H. Zhang, W. Wang, K. Sun, Y. Pan, S. Liu, H. Zhu, W. Guo, Y. Li, Y. Liu, C. Liu, Construction of N-doped carbon frames anchored with Co single atoms and Co nanoparticles as robust electrocatalyst for hydrogen evolution in the entire pH range, J. Energy Chem. 67 (2022) 147-156.
